# Supplementary material for: The Speciated Isoprene Emission Model with the MEGAN Algorithm for China (SieMAC)
Source: Copernicus journal article supplement (doi:10.5194/egusphere-2025-2899), 2025-06-27
Supplement: Supplementary file [file egusphere-2025-2899-AC1-supplement.pdf]

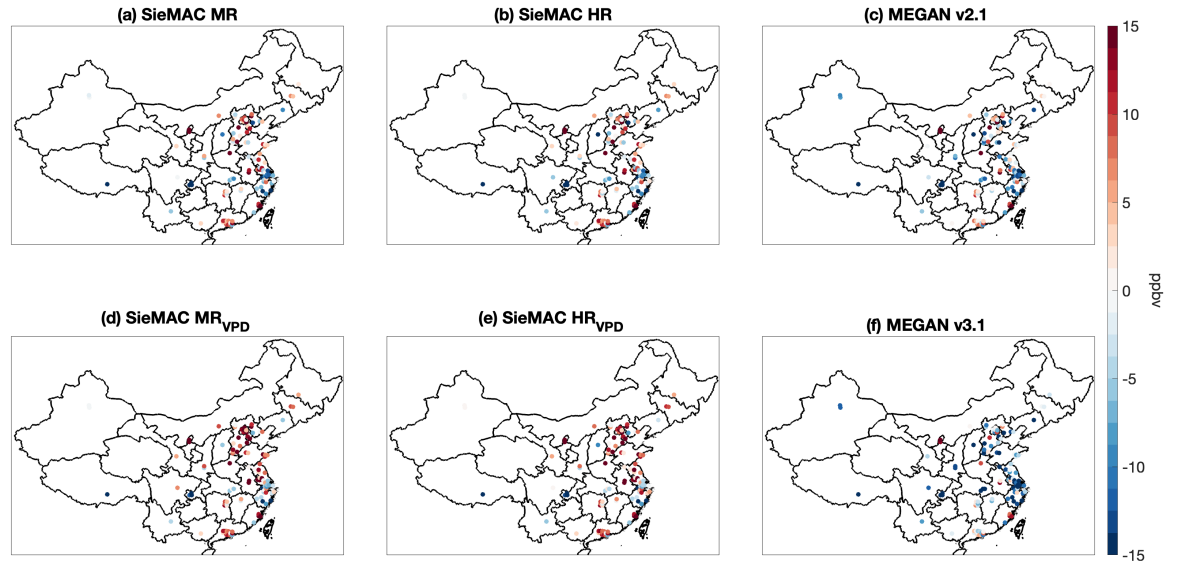

**Figure 1. Spatial distribution of MDA8 O<sub>3</sub> mean bias for summer 2013 (all days).** Mean bias (model minus observation) at each CNEMC monitoring site for six emission inventories: (a) SieMAC MR, (b) SieMAC HR, (c) MEGAN v2.1, (d) SieMAC MR<sub>VPD</sub>, (e) SieMAC HR<sub>VPD</sub>, and (f) MEGAN v3.1. Colors indicate bias magnitude in ppbv (scale at right); red shades show model overestimation and blue shades show model underestimation relative to observations.

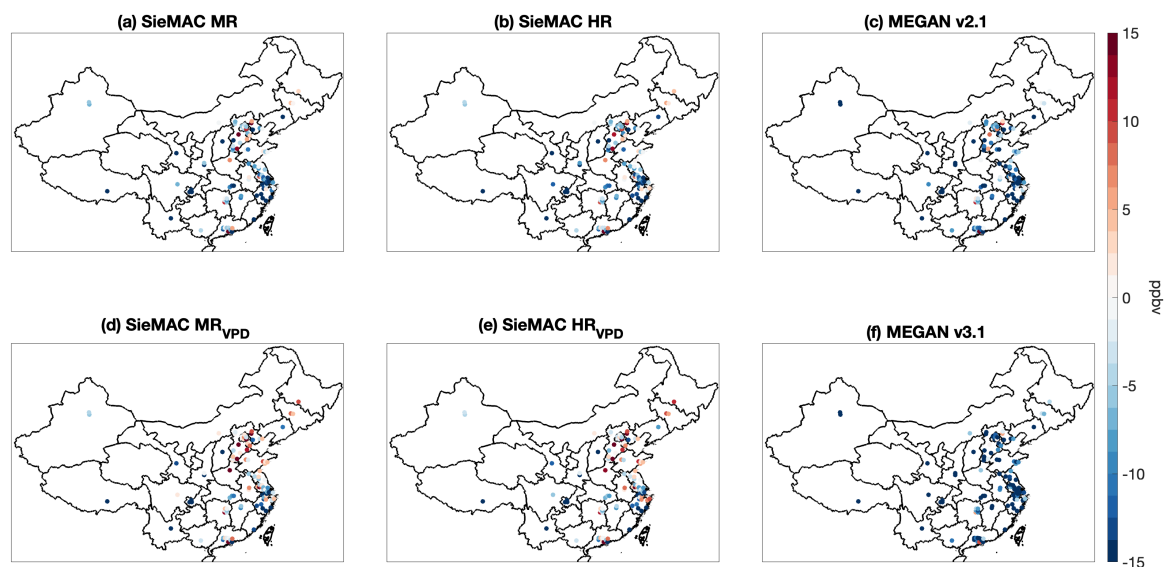

**Figure 2. Spatial distribution of MDA8 O<sub>3</sub> mean bias for high ozone days (MDA8 O<sub>3</sub> ≥ 60 ppbv).** Mean bias (model minus observation) at each CNEMC monitoring site during days when observed MDA8 ozone concentrations exceed 60 ppbv, shown for six emission inventories: (a) SieMAC MR, (b) SieMAC HR, (c) MEGAN v2.1, (d) SieMAC MR<sub>VPD</sub>, (e) SieMAC HR<sub>VPD</sub>, and (f) MEGAN v3.1. Colors indicate bias magnitude in ppbv (scale at right); red shades show model overestimation and blue shades show model underestimation relative to observations.
