# Supplementary material for: The Speciated Isoprene Emission Model with the MEGAN Algorithm for China (SieMAC)
Source: Copernicus journal article supplement (doi:10.5194/egusphere-2025-2899), 2025-06-27
Supplement: Supplementary file [file egusphere-2025-2899-RC1-supplement.pdf]

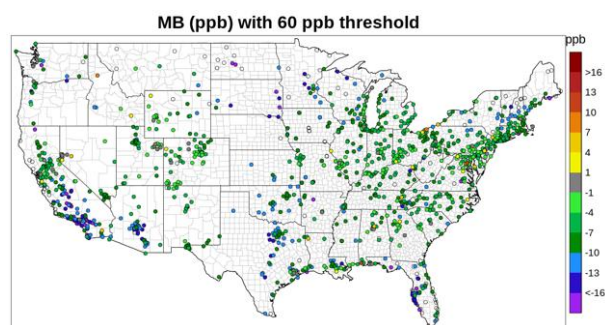

A recommended figure to show in the paper, the mean biases in MDA8 O<sub>3</sub> with a threshold of 60 ppb.
